# Supplementary material
Source: PubMed Central journal article supplement (PMC8815444)
Supplement: NIHMS1724678-supplement-1.pdf [file NIHMS1724678-supplement-1.pdf]

**Immunotherapy-mediated thyroid dysfunction: genetic risk and impact on outcomes with PD-1 blockade in non-small cell lung cancer**

**SUPPLEMENT**

**Table of Contents**

|                                                                                                                                                                                      | <b>Page</b> |
|--------------------------------------------------------------------------------------------------------------------------------------------------------------------------------------|-------------|
| <b>Supplementary Figure 1.</b> Schema of methods.....                                                                                                                                | 2           |
| <b>Supplementary Figure 2.</b> Thyroid irAEs as a predictor of PFS and OS in individuals with OS > 90 days in the MSK cohort .....                                                   | 3           |
| <b>Supplementary Figure 3.</b> Validation of PRS models for thyroid disease developed in UK Biobank in BioVU.....                                                                    | 4           |
| <b>Supplementary Figure 4.</b> Hypothyroidism PRS as a predictor of CPI-induced hypothyroidism events in the MSK+VUMC cohort.....                                                    | 5           |
| <b>Supplementary Figure 5.</b> PRS values for DFCI tumor imputed and germline genotyped samples .....                                                                                | 6           |
| <b>Supplementary Figure 6.</b> Hypothyroidism PRS as a predictor of CPI-induced hypothyroidism events in the DFCI cohort.....                                                        | 7           |
| <b>Supplementary Figure 7.</b> PFS in the combined MSK+VUMC cohort and OS in the MSK cohort by PRS tertile.....                                                                      | 8           |
| <b>Supplementary Table 1.</b> Individual SNPs from the UK Biobank hypothyroidism GWAS that were associated with CPI-induced thyroid irAEs in the MSK+VUMC cohort at $p < 0.05$ ..... | 9           |
| <b>Supplementary Table 2.</b> PRS as a predictor of PFS and OS in the MSK+VUMC cohort.....                                                                                           | 12          |

# Supplementary Figure 1

(1) Evaluation of impact of thyroid irAEs on outcomes to PD-1 blockade therapy

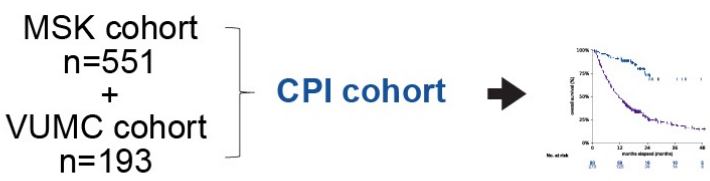

(2) Derivation of spontaneous hypothyroidism PRS

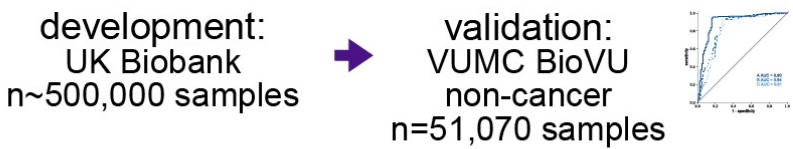

hypothyroid polygenic risk score (PRS)

(3) Assessment of PRS in predicting thyroid irAEs in patients who received PD-1 blockade therapy

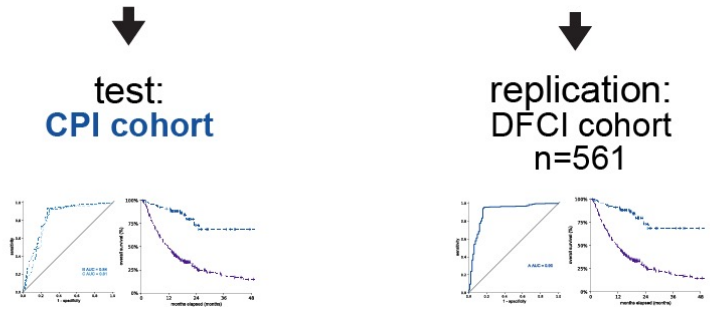

**Supplementary Figure 1.** Schema of the methods for examining the relationships between spontaneous hypothyroidism, thyroid irAEs, and response to anti-PD-1 therapy.

# Supplementary Figure 2

## Progression-Free Survival

Thyroid irAE No thyroid irAE

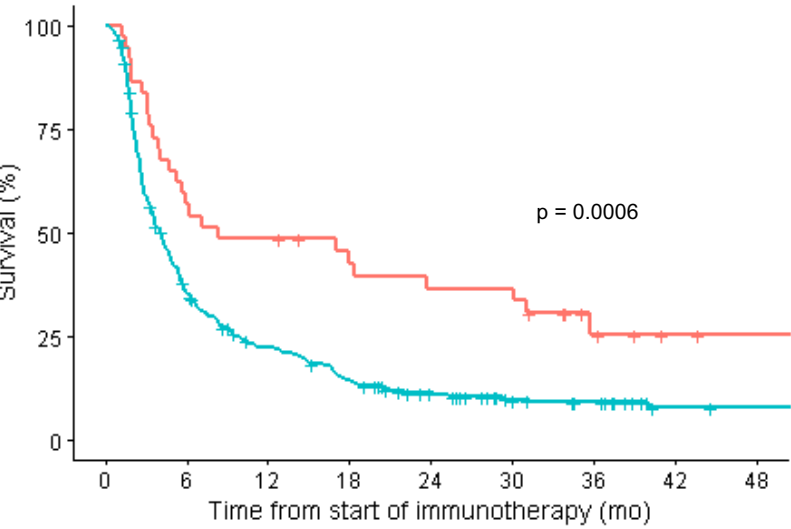

Number at risk

|                 |                                       |     |    |    |    |    |    |    |    |  |
|-----------------|---------------------------------------|-----|----|----|----|----|----|----|----|--|
| Strata          | 37                                    | 21  | 18 | 14 | 12 | 12 | 5  | 2  | 1  |  |
| Thyroid irAE    |                                       |     |    |    |    |    |    |    |    |  |
| No thyroid irAE | 438                                   | 150 | 89 | 56 | 36 | 21 | 17 | 7  | 6  |  |
|                 | 0                                     | 6   | 12 | 18 | 24 | 30 | 36 | 42 | 48 |  |
|                 | Time from start of immunotherapy (mo) |     |    |    |    |    |    |    |    |  |

## Overall Survival

Thyroid irAE No thyroid irAE

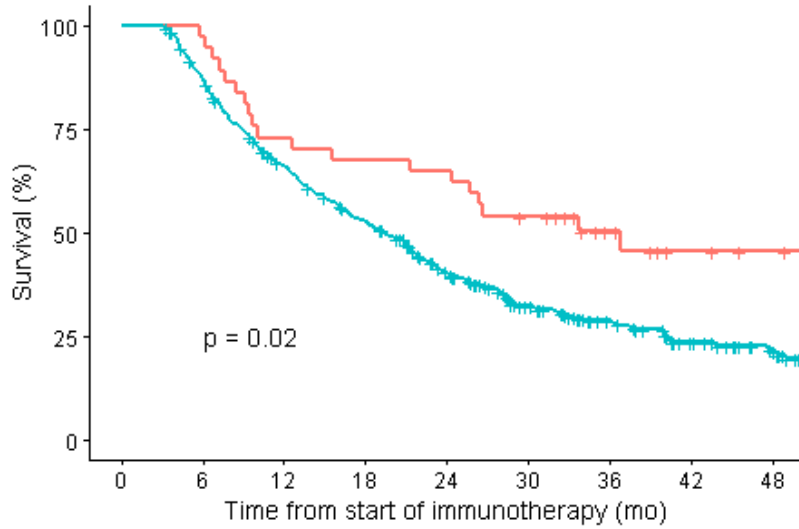

Number at risk

|                 |                                       |     |     |     |     |    |    |    |    |  |
|-----------------|---------------------------------------|-----|-----|-----|-----|----|----|----|----|--|
| Strata          | 37                                    | 36  | 27  | 25  | 24  | 19 | 11 | 6  | 4  |  |
| Thyroid irAE    |                                       |     |     |     |     |    |    |    |    |  |
| No thyroid irAE | 438                                   | 375 | 273 | 215 | 148 | 98 | 65 | 41 | 27 |  |
|                 | 0                                     | 6   | 12  | 18  | 24  | 30 | 36 | 42 | 48 |  |
|                 | Time from start of immunotherapy (mo) |     |     |     |     |    |    |    |    |  |

**Supplementary Figure 2.** Thyroid irAEs as a predictor of PFS and OS in individuals with OS > 90 days in the MSK cohort. Kaplan-Meier survival curves are unadjusted and compare those who had a thyroid irAE to those who did not have a thyroid irAE. The x-axis reflects time from start of CPI therapy.

# Supplementary Figure 3

A

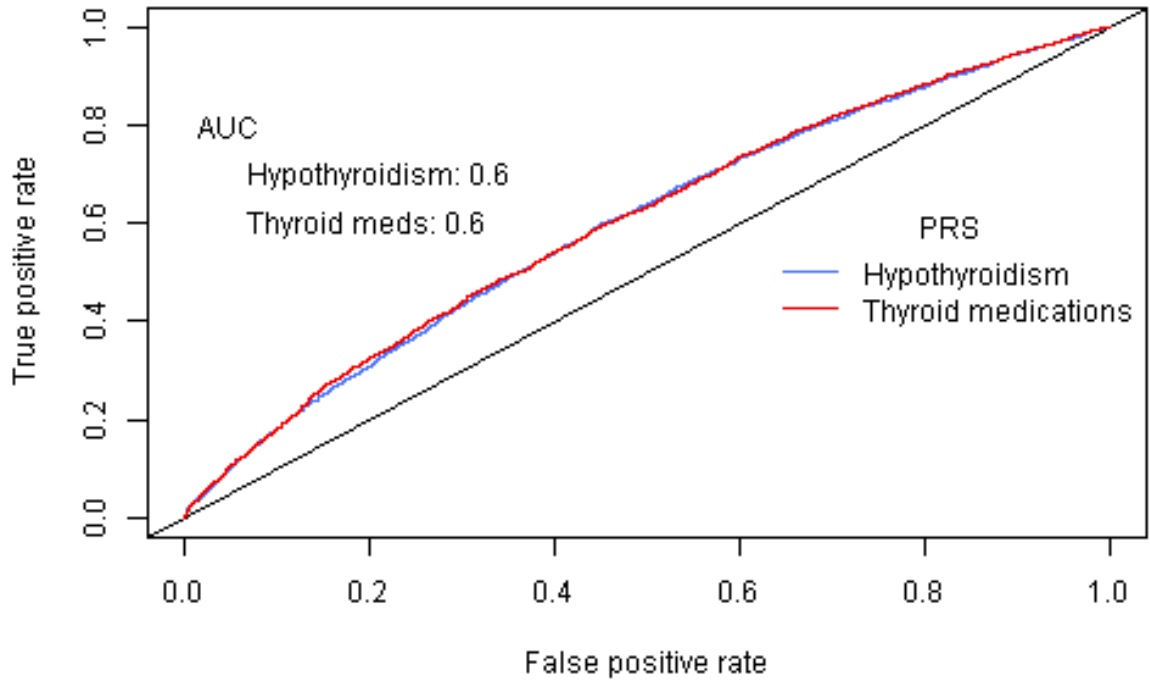

B

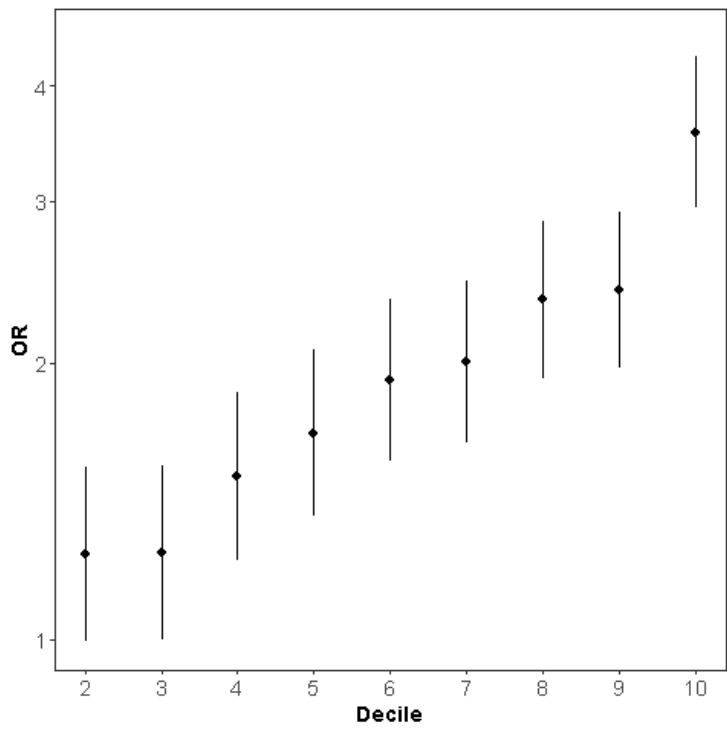

**Supplementary Figure 3.** Validation of PRS models for thyroid disease developed in UK Biobank in BioVU. ROC curves for PRS for self-reported hypothyroidism and taking thyroid medications were developed in UK Biobank using LDpred and tested in BioVU among participants who were not known to have lung cancer and received CPI. B. Relative risk of PRS by decile in the non-cancer VUMC BioVU cohort.

# Supplementary Figure 4

## Thyroid Medication PRS

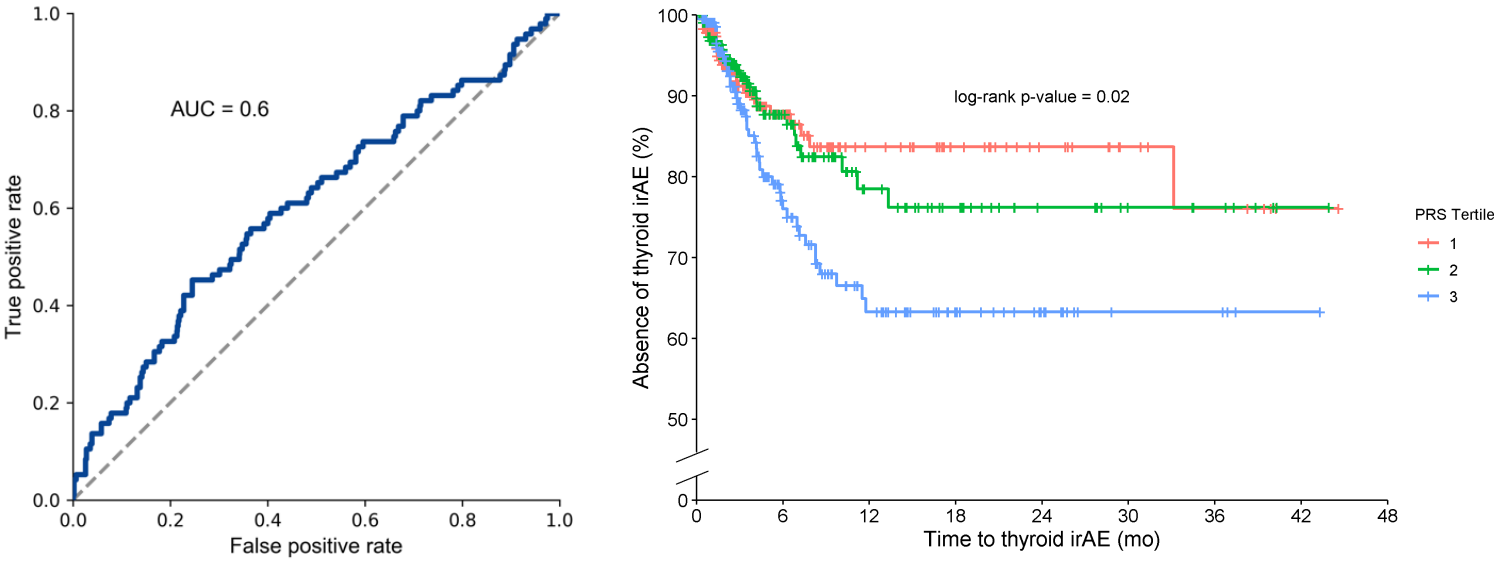

**Supplementary Figure 4.** Hypothyroidism PRS (using thyroid medication PRS) as a predictor of CPI-induced hypothyroidism events in the VUMC and MSK cohort. The left panel shows the ROC curve and right panel shows time to event by PRS tertile. P-values for the three curves are calculated using a log-rank test.

# Supplementary Figure 5

## A

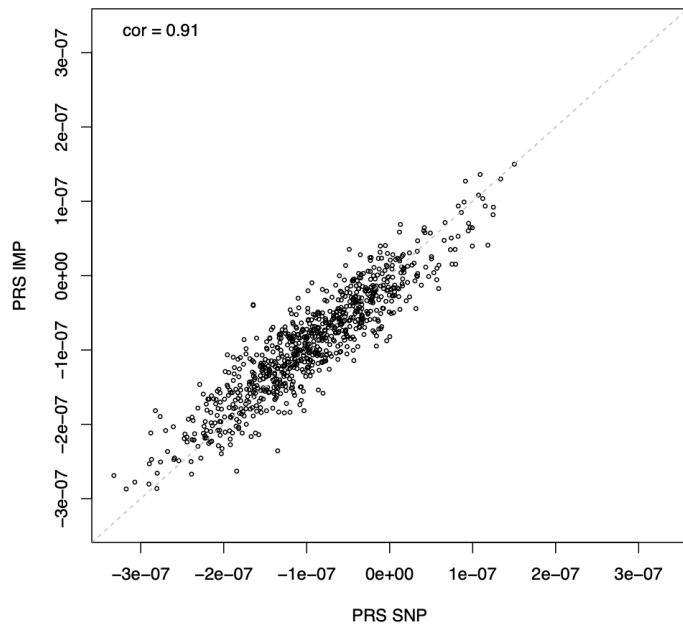

## B

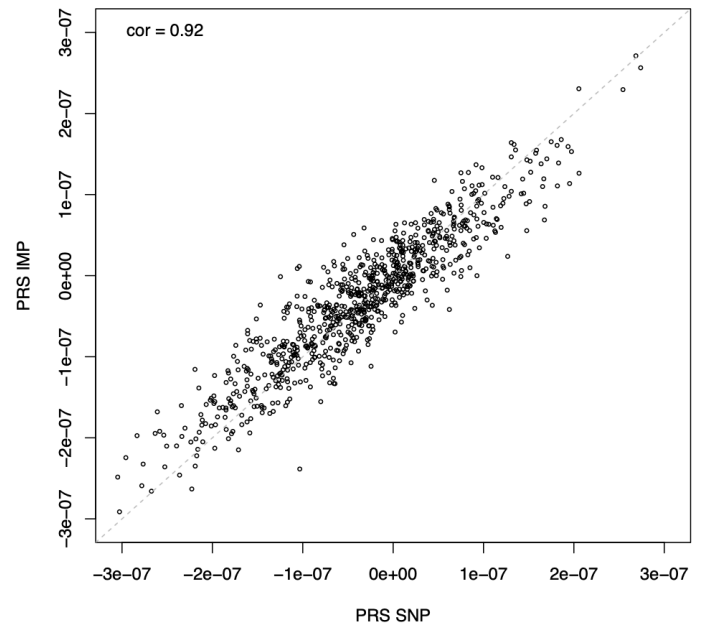

**Supplementary Figure 5.** PRS values for DFCI tumor imputed and germline genotyped samples. PRSs shown are: (A) hypothyroidism and (B) thyroid medication. Each point represents an individual with genotyped (x-axis) and imputed (y-axis) PRS values. Pearson correlation between the scores is listed in each panel.

# Supplementary Figure 6

## Thyroid Medication PRS

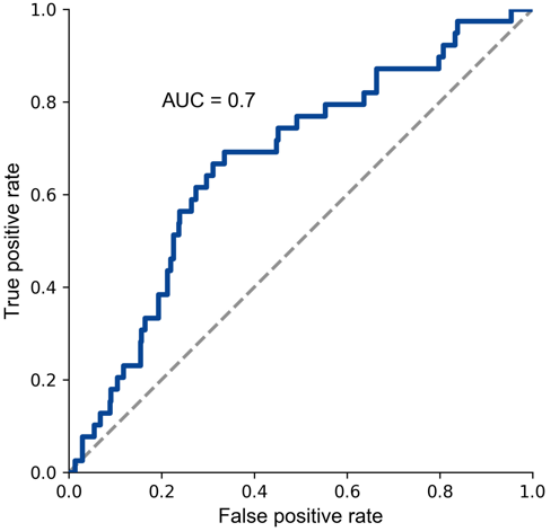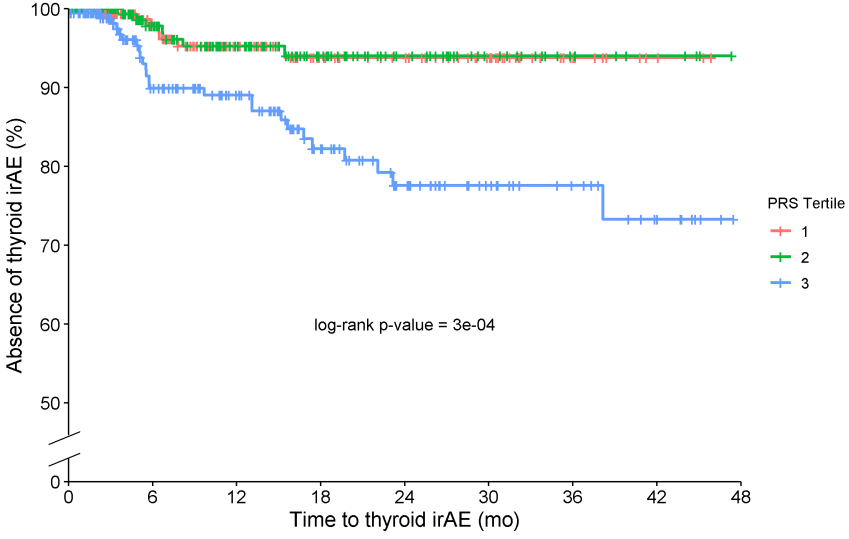

**Supplementary Figure 6:** Hypothyroidism PRS (using thyroid medication PRS) as a predictor of CPI-induced hypothyroidism events in the DFCI cohort. The left panel shows the ROC curve and right panel shows time to event by PRS tertile. P-values for the three curves are calculated using a log-rank test.

# Supplementary Figure 7

A

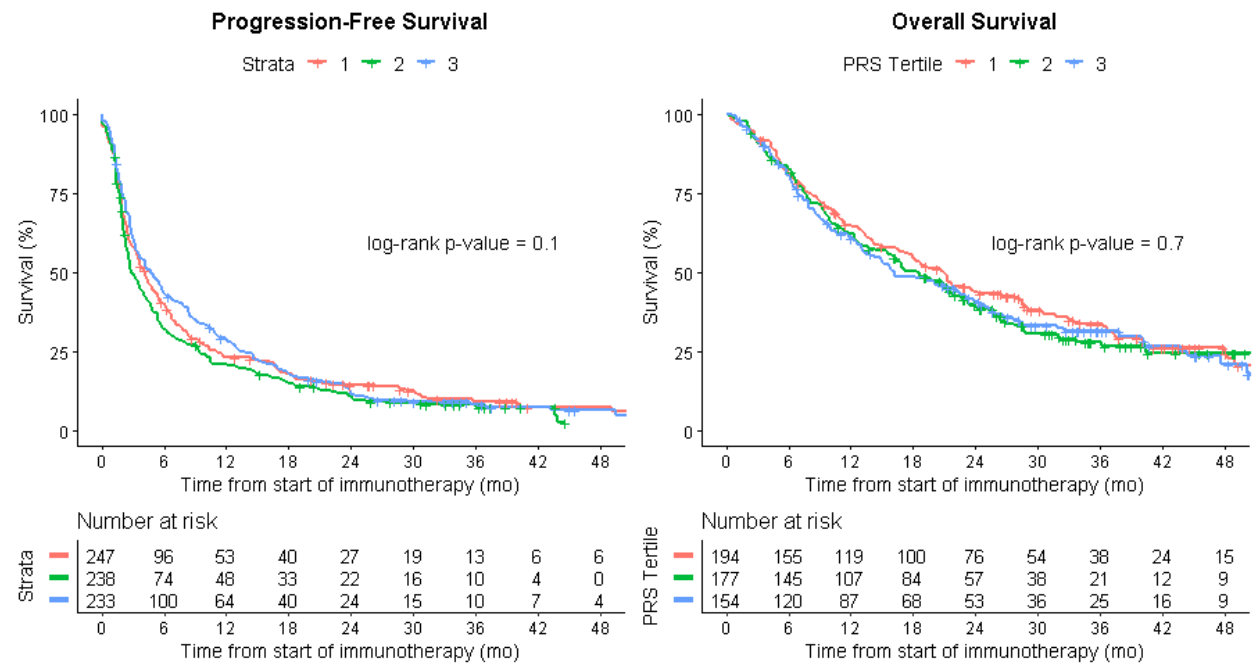

B

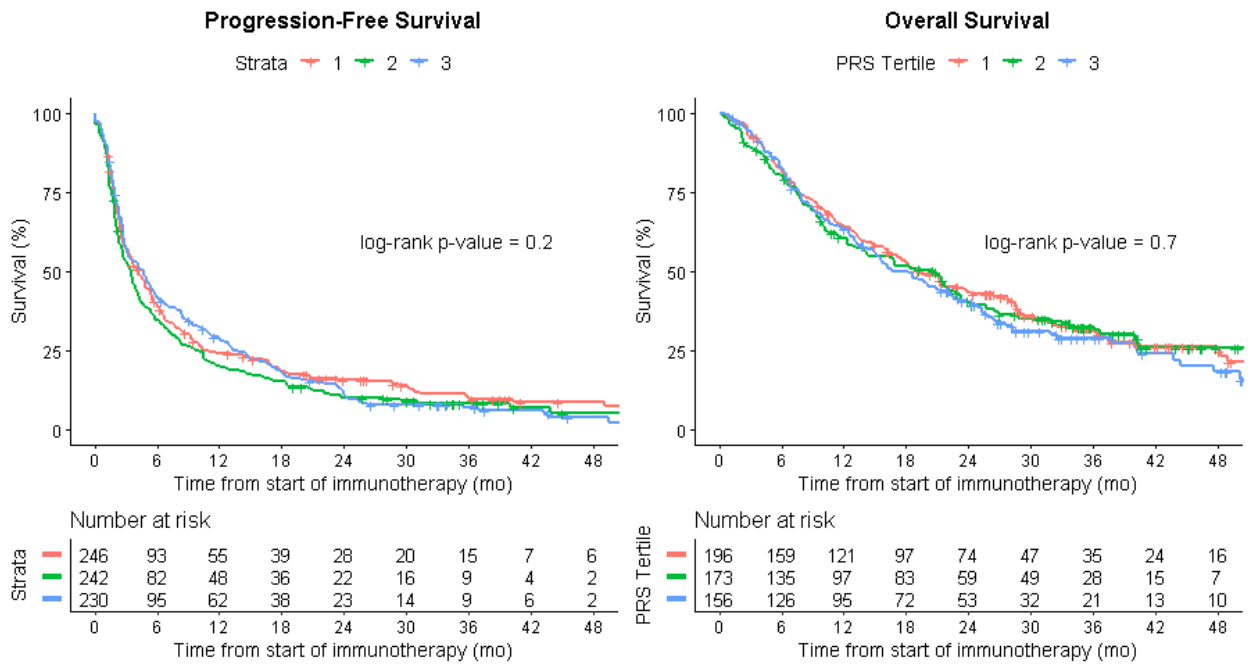

**Supplementary Figure 7.** PFS in the combined MSK + VUMC cohort and OS in the MSK cohort starting from the time of CPI therapy start by PRS tertile. (A) hypothyroidism PRS and (B) thyroid medication PRS



**Supplementary Table 1.** Individual SNPs from the UK Biobank hypothyroidism GWAS that were associated with CPI-induced thyroid irAEs in the MSK + VUMC cohort at  $p < 0.05$ . Bold italics indicates variant passed multiple hypothesis testing. Effect and alternate alleles in the MSK + VUMC cohort were aligned to the effect and alternate alleles in the original UK Biobank GWAS. Models in the MSK + VUMC cohort were adjusted for age at diagnosis, sex, and the first ten principal components.

Chr: chromosome, SNP: single nucleotide polymorphism, Alt allele: alternate allele, freq: frequency, HR: hazard ratio, L95: lower 95% confidence interval, U95: upper 95% confidence interval

| Variant Information |                   |             |               |            | MSK + VUMC Cohort Results |      |      |      |          | UK Biobank GWAS Results |          |                |          |
|---------------------|-------------------|-------------|---------------|------------|---------------------------|------|------|------|----------|-------------------------|----------|----------------|----------|
| Chr                 | Position (GRCh37) | SNP         | Effect allele | Alt allele | Effect allele freq        | HR   | L95  | U95  | p-value  | Effect allele freq      | $\beta$  | standard error | p-value  |
| 6                   | 32379295          | rs9268515   | G             | C          | 0.86                      | 0.5  | 0.35 | 0.71 | 1.12E-04 | 0.81                    | -0.00519 | 0.000883       | 2.80E-09 |
| 16                  | 67973953          | rs5923      | G             | A          | 0.93                      | 0.45 | 0.28 | 0.72 | 8.80E-04 | 0.95                    | -0.00574 | 0.001039       | 2.60E-08 |
| 16                  | 67476572          | rs8056260   | A             | G          | 0.91                      | 0.43 | 0.25 | 0.72 | 1.37E-03 | 0.96                    | -0.00704 | 0.001075       | 3.80E-11 |
| 8                   | 141639262         | rs11783023  | C             | T          | 0.26                      | 1.62 | 1.19 | 2.21 | 2.09E-03 | 0.28                    | 0.003325 | 0.000491       | 1.20E-11 |
| 16                  | 68361498          | rs7206600   | C             | T          | 0.96                      | 0.41 | 0.23 | 0.73 | 2.41E-03 | 0.98                    | -0.00807 | 0.001454       | 2.60E-08 |
| 2                   | 204769395         | rs28386480  | C             | T          | 0.52                      | 1.55 | 1.15 | 2.1  | 3.72E-03 | 0.54                    | 0.002749 | 0.000442       | 6.60E-10 |
| 6                   | 32608931          | rs9272679   | T             | C          | 0.76                      | 1.76 | 1.2  | 2.57 | 3.77E-03 | 0.43                    | -0.00992 | 0.000665       | 5.80E-50 |
| 6                   | 32587350          | rs1281932   | G             | A          | 0.81                      | 0.62 | 0.45 | 0.86 | 4.68E-03 | 0.8                     | -0.00974 | 0.000792       | 1.40E-34 |
| 20                  | 17860022          | rs6111715   | G             | C          | 0.81                      | 0.61 | 0.43 | 0.86 | 4.87E-03 | 0.82                    | 0.003711 | 0.000576       | 7.80E-11 |
| 2                   | 204698111         | rs2882970   | T             | C          | 0.74                      | 1.7  | 1.17 | 2.48 | 5.53E-03 | 0.75                    | 0.005722 | 0.000518       | 8.70E-29 |
| 1                   | 200840467         | rs12756886  | T             | C          | 0.89                      | 0.56 | 0.37 | 0.85 | 6.01E-03 | 0.88                    | -0.00437 | 0.00068        | 9.40E-11 |
| 6                   | 32633282          | rs9274447   | T             | C          | 0.79                      | 1.83 | 1.19 | 2.81 | 6.15E-03 | 0.66                    | -0.00775 | 0.00069        | 1.80E-28 |
| 4                   | 10716939          | rs4293777   | G             | C          | 0.53                      | 0.66 | 0.49 | 0.89 | 6.23E-03 | 0.53                    | -0.0037  | 0.000442       | 7.80E-17 |
| 16                  | 68390697          | rs61733486  | C             | T          | 0.94                      | 0.5  | 0.3  | 0.83 | 7.28E-03 | 0.94                    | -0.00521 | 0.000946       | 2.30E-08 |
| 6                   | 29367498          | rs4713220   | A             | T          | 0.56                      | 1.52 | 1.12 | 2.06 | 7.31E-03 | 0.57                    | 0.003625 | 0.000654       | 2.60E-10 |
| 12                  | 111582630         | rs73413596  | T             | C          | 0.87                      | 0.56 | 0.37 | 0.86 | 7.86E-03 | 0.92                    | 0.00514  | 0.000839       | 3.10E-10 |
| 11                  | 116979911         | rs12271161  | G             | A          | 0.78                      | 1.83 | 1.17 | 2.86 | 7.88E-03 | 0.81                    | 0.003652 | 0.000559       | 3.10E-11 |
| 6                   | 31437566          | rs9404989   | G             | T          | 0.98                      | 0.32 | 0.14 | 0.74 | 8.22E-03 | 0.98                    | 0.013439 | 0.001705       | 2.50E-14 |
| 7                   | 37382465          | rs60600003  | T             | G          | 0.9                       | 0.56 | 0.36 | 0.86 | 8.24E-03 | 0.9                     | -0.0044  | 0.000739       | 9.30E-10 |
| 6                   | 31312058          | rs2394977   | C             | G          | 0.58                      | 0.68 | 0.51 | 0.91 | 1.04E-02 | 0.56                    | 0.004264 | 0.000653       | 1.00E-15 |
| 6                   | 31463128          | rs9267352   | G             | A          | 0.74                      | 0.66 | 0.47 | 0.91 | 1.14E-02 | 0.74                    | 0.005833 | 0.000676       | 7.20E-16 |
| 6                   | 31616174          | rs569347663 | A             | T          | 0.97                      | 0.44 | 0.24 | 0.84 | 1.20E-02 | 1                       | -0.0354  | 0.005556       | 1.60E-10 |
| 2                   | 1378060           | rs4927602   | G             | A          | 0.49                      | 0.69 | 0.51 | 0.93 | 1.36E-02 | 0.5                     | -0.00264 | 0.000467       | 2.40E-08 |
| 3                   | 188070964         | rs2103022   | A             | G          | 0.23                      | 1.53 | 1.09 | 2.15 | 1.41E-02 | 0.24                    | 0.002904 | 0.000527       | 1.40E-08 |
| 14                  | 98692996          | rs1257926   | G             | A          | 0.53                      | 0.7  | 0.53 | 0.94 | 1.59E-02 | 0.52                    | -0.00278 | 0.000443       | 1.10E-10 |
| 6                   | 32605295          | rs1129735   | C             | T          | 0.66                      | 0.7  | 0.52 | 0.94 | 1.67E-02 | 0.63                    | -0.00923 | 0.0007         | 8.00E-41 |

|    |           |             |   |   |      |      |      |      |          |      |          |          |          |
|----|-----------|-------------|---|---|------|------|------|------|----------|------|----------|----------|----------|
| 6  | 31435869  | rs4713466   | C | T | 0.89 | 0.62 | 0.42 | 0.92 | 1.71E-02 | 0.86 | 0.005798 | 0.000943 | 3.10E-09 |
| 6  | 31436047  | rs2518028   | T | C | 0.32 | 0.66 | 0.47 | 0.93 | 1.73E-02 | 0.35 | 0.005452 | 0.000708 | 8.90E-19 |
| 14 | 68749927  | rs3784099   | G | A | 0.67 | 1.5  | 1.07 | 2.11 | 1.77E-02 | 0.72 | 0.003107 | 0.000491 | 2.70E-11 |
| 1  | 108379684 | rs2125748   | G | A | 0.77 | 1.57 | 1.08 | 2.28 | 1.89E-02 | 0.75 | 0.002831 | 0.000512 | 1.80E-08 |
| 6  | 32587588  | rs9271406   | A | G | 0.56 | 0.71 | 0.54 | 0.95 | 2.08E-02 | 0.5  | -0.00606 | 0.000686 | 4.60E-23 |
| 17 | 7240391   | rs61759532  | C | T | 0.83 | 0.69 | 0.5  | 0.94 | 2.11E-02 | 0.75 | -0.00399 | 0.000527 | 1.00E-14 |
| 6  | 32580591  | rs7449585   | G | T | 0.74 | 0.7  | 0.52 | 0.95 | 2.12E-02 | 0.95 | 0.010027 | 0.001139 | 1.60E-20 |
| 6  | 32624377  | rs567302488 | G | A | 0.93 | 3.19 | 1.19 | 8.59 | 2.15E-02 | 0.62 | -0.00888 | 0.000693 | 1.70E-37 |
| 6  | 31247441  | rs2844607   | C | T | 0.78 | 0.69 | 0.5  | 0.95 | 2.27E-02 | 0.72 | 0.005255 | 0.000684 | 1.30E-10 |
| 9  | 21637351  | rs71504798  | C | G | 0.92 | 3.11 | 1.17 | 8.26 | 2.28E-02 | 0.91 | -0.00499 | 0.000767 | 8.20E-11 |
| 11 | 117030633 | rs200545029 | T | C | 0.94 | 2.75 | 1.15 | 6.59 | 2.34E-02 | 0.94 | 0.006043 | 0.000953 | 8.60E-11 |
| 6  | 32078373  | rs3807039   | A | C | 0.92 | 0.61 | 0.39 | 0.94 | 2.36E-02 | 0.89 | -0.00487 | 0.000805 | 2.20E-08 |
| 3  | 105911539 | rs7633167   | C | A | 0.44 | 0.71 | 0.53 | 0.96 | 2.37E-02 | 0.43 | 0.002601 | 0.000448 | 5.70E-09 |
| 1  | 108337108 | rs17484960  | G | A | 0.55 | 0.72 | 0.54 | 0.96 | 2.38E-02 | 0.5  | -0.00312 | 0.000441 | 9.00E-13 |
| 1  | 236629134 | rs12117927  | C | A | 0.54 | 0.71 | 0.53 | 0.96 | 2.52E-02 | 0.51 | -0.00267 | 0.000452 | 1.10E-09 |
| 6  | 32402889  | rs9268615   | G | A | 0.55 | 0.72 | 0.55 | 0.96 | 2.55E-02 | 0.64 | -0.0069  | 0.000848 | 1.10E-15 |
| 19 | 7240776   | rs4804433   | G | T | 0.25 | 1.42 | 1.04 | 1.93 | 2.56E-02 | 0.21 | 0.00325  | 0.00054  | 5.80E-09 |
| 6  | 32603321  | rs62404084  | C | T | 0.84 | 0.66 | 0.45 | 0.95 | 2.71E-02 | 0.81 | 0.005054 | 0.000717 | 6.40E-10 |
| 3  | 12195622  | rs308952    | A | G | 0.14 | 0.52 | 0.3  | 0.93 | 2.75E-02 | 0.13 | 0.004684 | 0.000648 | 1.40E-13 |
| 3  | 188080043 | rs7640386   | T | C | 0.75 | 0.68 | 0.48 | 0.96 | 2.78E-02 | 0.78 | -0.00432 | 0.000532 | 2.00E-16 |
| 9  | 100506414 | rs7862400   | C | A | 0.44 | 0.71 | 0.52 | 0.96 | 2.80E-02 | 0.53 | -0.00331 | 0.000447 | 3.90E-14 |
| 9  | 100737755 | rs10984601  | A | G | 0.74 | 0.71 | 0.52 | 0.96 | 2.88E-02 | 0.7  | -0.00388 | 0.000491 | 1.50E-15 |
| 16 | 67349478  | rs138453996 | G | A | 0.97 | 0.46 | 0.23 | 0.93 | 2.97E-02 | 0.98 | -0.01041 | 0.001578 | 3.10E-11 |
| 6  | 29566369  | rs3095273   | A | G | 0.26 | 0.67 | 0.47 | 0.96 | 3.00E-02 | 0.29 | -0.00376 | 0.000667 | 3.00E-08 |
| 6  | 32781776  | rs2856997   | C | A | 0.6  | 0.71 | 0.52 | 0.97 | 3.00E-02 | 0.61 | 0.003736 | 0.000577 | 1.60E-08 |
| 6  | 91024294  | rs927297    | G | C | 0.35 | 1.39 | 1.03 | 1.86 | 3.04E-02 | 0.4  | 0.003524 | 0.000456 | 4.70E-15 |
| 9  | 5425847   | rs10815220  | A | G | 0.75 | 1.47 | 1.04 | 2.09 | 3.09E-02 | 0.72 | -0.00308 | 0.000491 | 4.80E-10 |
| 6  | 31850308  | rs74434374  | C | A | 0.95 | 0.55 | 0.32 | 0.95 | 3.17E-02 | 0.95 | 0.008211 | 0.001318 | 2.30E-10 |
| 6  | 31249127  | rs2253487   | G | A | 0.6  | 0.73 | 0.55 | 0.97 | 3.18E-02 | 0.59 | 0.004741 | 0.000632 | 2.00E-09 |
| 9  | 21585265  | rs970987    | C | A | 0.37 | 0.69 | 0.49 | 0.97 | 3.33E-02 | 0.34 | 0.003916 | 0.000468 | 3.80E-17 |
| 2  | 204573392 | rs35988305  | C | G | 0.62 | 1.38 | 1.02 | 1.87 | 3.59E-02 | 0.64 | 0.003279 | 0.000459 | 2.90E-13 |
| 6  | 31397689  | rs143015185 | A | T | 0.96 | 0.53 | 0.3  | 0.96 | 3.61E-02 | 0.95 | -0.01705 | 0.001288 | 5.30E-25 |
| 4  | 149648035 | rs17583283  | G | A | 0.52 | 0.74 | 0.55 | 0.98 | 3.62E-02 | 0.56 | 0.00319  | 0.000446 | 3.50E-13 |
| 5  | 133455153 | rs244693    | A | C | 0.07 | 1.66 | 1.03 | 2.67 | 3.64E-02 | 0.08 | 0.005357 | 0.000824 | 9.60E-11 |
| 10 | 63809624  | rs10821948  | C | A | 0.62 | 0.73 | 0.55 | 0.98 | 3.77E-02 | 0.68 | -0.00397 | 0.000474 | 1.20E-17 |
| 6  | 32667595  | rs1794279   | G | T | 0.92 | 2.13 | 1.04 | 4.37 | 3.85E-02 | 0.87 | -0.0141  | 0.001508 | 2.80E-19 |
| 6  | 32582603  | rs13204736  | G | T | 0.65 | 0.74 | 0.55 | 0.99 | 3.94E-02 | 0.7  | -0.00642 | 0.000762 | 3.00E-18 |
| 4  | 40307564  | rs13136820  | C | T | 0.36 | 1.36 | 1.02 | 1.83 | 3.95E-02 | 0.32 | 0.002945 | 0.000475 | 8.90E-10 |
| 19 | 50197406  | rs12981033  | A | G | 0.58 | 0.73 | 0.54 | 0.99 | 3.98E-02 | 0.61 | 0.00303  | 0.000452 | 7.00E-12 |
| 1  | 108321313 | rs4914960   | A | G | 0.22 | 0.66 | 0.44 | 0.98 | 4.08E-02 | 0.19 | -0.00421 | 0.00056  | 3.70E-14 |

|    |           |             |   |   |      |      |      |      |          |      |          |          |          |
|----|-----------|-------------|---|---|------|------|------|------|----------|------|----------|----------|----------|
| 4  | 149720635 | rs13143096  | C | T | 0.5  | 0.74 | 0.55 | 0.99 | 4.14E-02 | 0.5  | 0.002441 | 0.000444 | 1.90E-08 |
| 8  | 8317887   | rs2921059   | G | T | 0.95 | 0.56 | 0.32 | 0.98 | 4.19E-02 | 0.56 | 0.005286 | 0.000867 | 9.60E-10 |
| 16 | 79337033  | rs2881665   | C | T | 0.16 | 1.5  | 1.01 | 2.22 | 4.22E-02 | 0.12 | 0.003754 | 0.000682 | 3.90E-08 |
| 12 | 112179471 | rs4766897   | T | C | 0.29 | 1.36 | 1.01 | 1.83 | 4.22E-02 | 0.34 | 0.008059 | 0.000466 | 2.20E-68 |
| 2  | 204740866 | rs231726    | C | T | 0.7  | 0.72 | 0.53 | 0.99 | 4.26E-02 | 0.67 | -0.0087  | 0.00047  | 7.00E-77 |
| 6  | 31080859  | rs2233966   | A | G | 0.46 | 1.35 | 1.01 | 1.81 | 4.26E-02 | 0.5  | -0.00759 | 0.000764 | 7.30E-16 |
| 6  | 31403625  | rs7759215   | C | T | 0.97 | 0.56 | 0.32 | 0.98 | 4.35E-02 | 0.87 | -0.00919 | 0.000835 | 1.50E-21 |
| 6  | 32594470  | rs114309058 | G | A | 0.49 | 1.35 | 1.01 | 1.8  | 4.54E-02 | 0.75 | 0.005841 | 0.000705 | 4.30E-16 |
| 17 | 7252148   | rs2292067   | G | T | 0.65 | 0.73 | 0.54 | 0.99 | 4.57E-02 | 0.63 | -0.00264 | 0.000461 | 5.70E-09 |
| 13 | 111206226 | rs9521838   | G | A | 0.8  | 1.48 | 1.01 | 2.19 | 4.65E-02 | 0.77 | 0.002838 | 0.000525 | 4.80E-08 |
| 6  | 33047898  | rs2567281   | C | A | 0.89 | 1.99 | 1.01 | 3.95 | 4.77E-02 | 0.92 | 0.006656 | 0.000861 | 6.70E-15 |
| 13 | 24789706  | rs1220604   | G | A | 0.53 | 1.35 | 1    | 1.81 | 4.83E-02 | 0.55 | -0.00267 | 0.000449 | 1.90E-09 |
| 9  | 21582326  | rs7046475   | T | C | 0.22 | 0.66 | 0.43 | 1    | 4.87E-02 | 0.22 | 0.004    | 0.000537 | 7.60E-14 |
| 6  | 33048937  | rs7770501   | C | G | 0.86 | 1.81 | 1    | 3.27 | 4.91E-02 | 0.88 | 0.006474 | 0.000764 | 8.20E-17 |
| 13 | 43063831  | rs66749983  | A | T | 0.7  | 1.4  | 1    | 1.94 | 4.91E-02 | 0.69 | -0.00361 | 0.000478 | 3.90E-14 |
| 6  | 31917291  | rs2072634   | C | T | 0.98 | 0.49 | 0.24 | 1    | 4.98E-02 | 0.98 | 0.01083  | 0.001717 | 1.10E-09 |

**Supplementary Table 2.** PRS as a predictor of PFS in the combined MSK + VUMC cohort and OS in the MSK cohort. Time-dependent models were adjusted for age, sex, combined anti-PD-(L)1 + anti-CTLA-4 therapy, and first 10 principal components. Adjusted hazard ratios are per standard deviation of the PRS.

|                     | PFS  |           |         | OS   |           |         |
|---------------------|------|-----------|---------|------|-----------|---------|
| PRS Phenotype       | aHR  | 95% CI    | p-value | aHR  | 95% CI    | p-value |
| Hypothyroidism      | 1.00 | 0.92-1.08 | 0.96    | 1.05 | 0.94-1.18 | 0.4     |
| Thyroid medications | 1.00 | 0.92-1.08 | 0.97    | 1.07 | 0.96-1.20 | 0.2     |
